# Supplementary figures and images for: One-step carbonization of a nickel-containing nitrogen-doped porous carbon material for electrochemical supercapacitors
Source: Royal Society of Chemistry journal article supplement (doi:10.1039/d0nj05283c), 2020-12-17

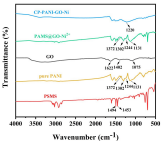

Supplement: d0nj05283c2.pdf [file d0nj05283c2.pdf]
